# Supplementary material for: Enhanced efficiency of graphene/silicon heterojunction solar cells by molecular doping
Source: Royal Society of Chemistry journal article supplement (doi:10.1039/c3ta01634j), 2013-01-01
Supplement: c3ta01634j.pdf [file c3ta01634j.pdf]

Electronic Supplementary Information for:

## Enhanced efficiency of graphene/silicon heterojunction solar cells by molecular doping

Tongxiang Cui<sup>1</sup>, Ruitao Lv<sup>2\*</sup>, Zheng-Hong Huang<sup>1</sup>, Shuxiao Chen<sup>1</sup>, Zexia Zhang<sup>1</sup>, Xin Gan<sup>1</sup>, Yi Jia<sup>3</sup>, Xinming Li<sup>4</sup>, Kunlin

Wang<sup>4</sup>, Dehai Wu<sup>4</sup>, Feiyu Kang<sup>1,3\*</sup>

<sup>1</sup>Laboratory of Advanced Materials, Department of Materials Science and Engineering, Tsinghua University, Beijing 100084, China

<sup>2</sup>Department of Physics, The Pennsylvania State University, University Park, PA 16802, USA.

<sup>3</sup>Graduate School at Shenzhen, Tsinghua University, Shenzhen, Guangdong Province, 518055, China

<sup>4</sup>Department of Mechanical Engineering and Key Laboratory for Advanced Manufacturing by Materials Processing Technology of Ministry of Education, Tsinghua University, Beijing 100084, China

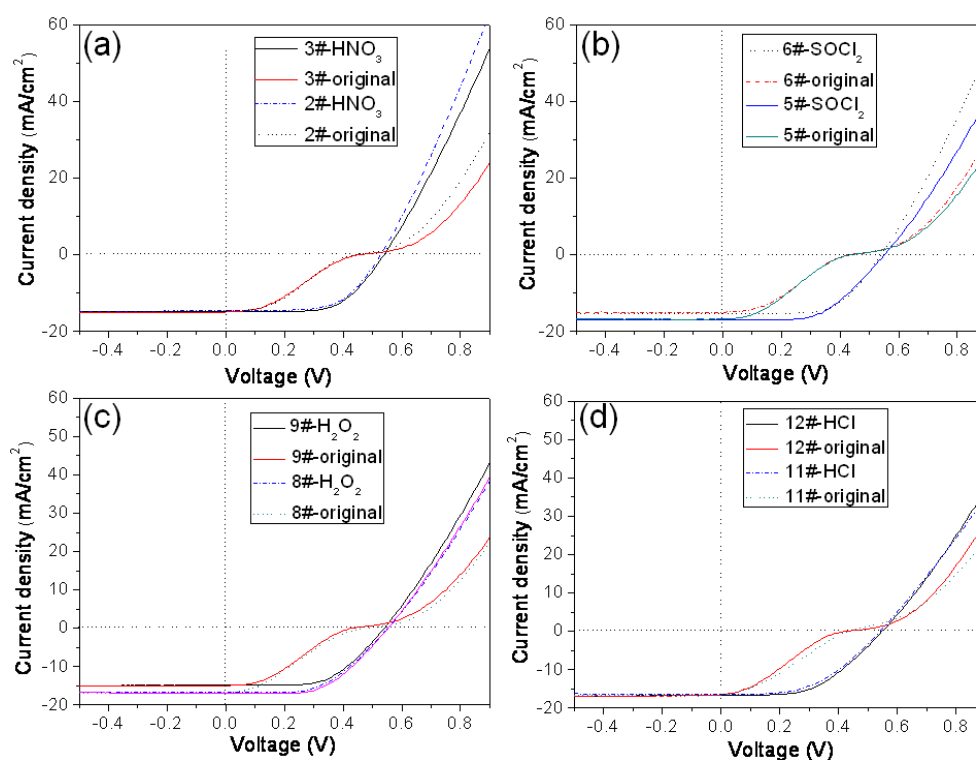

**Fig. S1** Light current density-voltage curves of 2#, 3#, 5#, 6#, 8#, 9#, 11# and 12# solar cells before and after volatile oxidant treatment. (a) 2# and 3#, (b) 5# and 6#, (c) 8# and 9#, (d) 11# and 12#.

\* Corresponding authors: Phone:+86 10 6277 3752, Fax: +86 10 6277 1160, E-mail address: fykang@tsinghua.edu.cn (F. Kang); Phone: (814) 865-0343, Email:rx140@psu.edu (R. Lv).

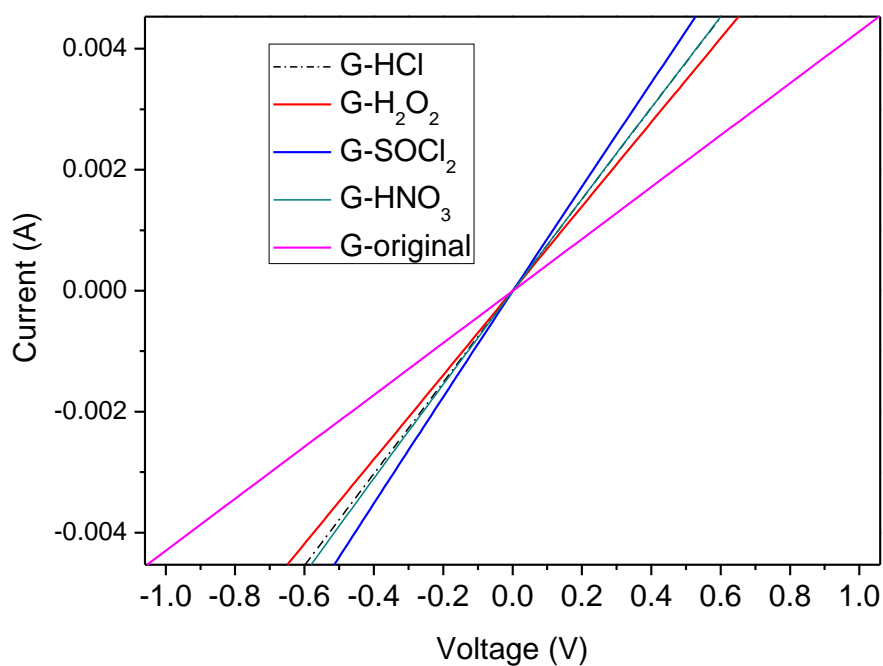

**Fig. S2** Current-voltage curves of pristine graphene and HNO<sub>3</sub>, SOCl<sub>2</sub>, H<sub>2</sub>O<sub>2</sub>, HCl treated graphene. (The slope of each line represents the corresponding sheet resistances of graphene)

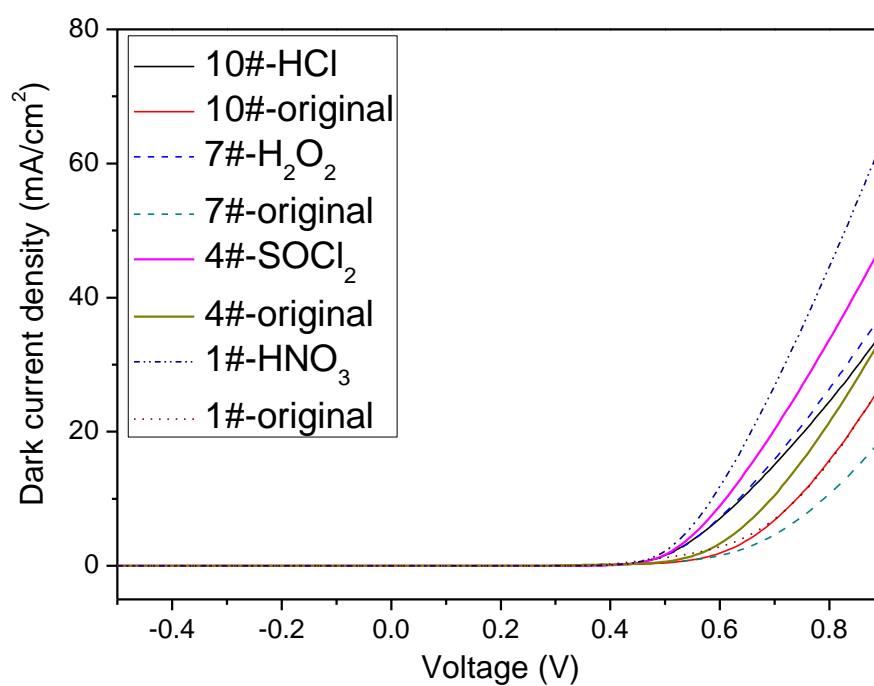

**Fig. S3** Dark current density-voltage curves of 1#, 4#, 7# and 10# cells before and after volatile oxidant treatment.

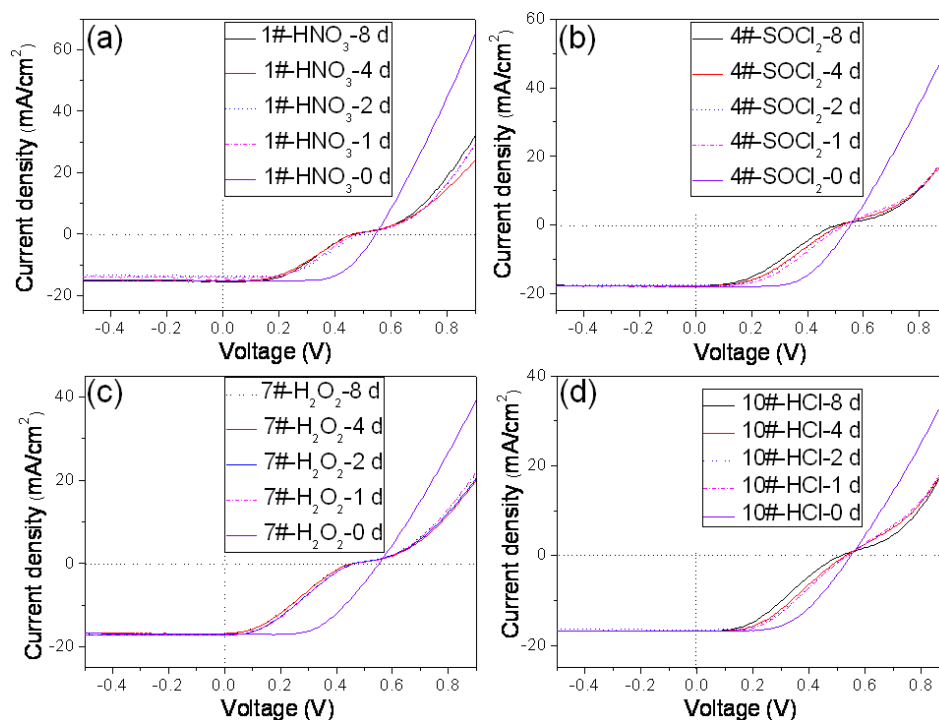

**Fig. S4** Light current density-voltage curves of 1#-HNO<sub>3</sub>, 4#-SOCl<sub>2</sub>, 7#-H<sub>2</sub>O<sub>2</sub>, and 10#-HCl cells during 8 days storage in air.

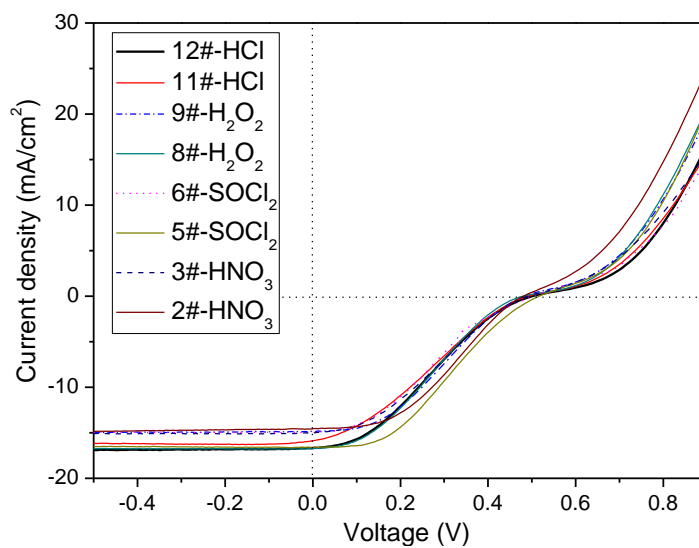

**Fig. S5** Light current density-voltage curves of 2#-HNO<sub>3</sub>, 3#-HNO<sub>3</sub>, 5#-SOCl<sub>2</sub>, 6#-SOCl<sub>2</sub>, 8#-H<sub>2</sub>O<sub>2</sub>, 9#-H<sub>2</sub>O<sub>2</sub>, 11#-HCl and 12#-HCl cells after 8 days storage in air.
